# Supplementary material for: The effect of a thermo-responsive polypeptide-based copolymer on the mineralization of calcium carbonate
Source: Royal Society of Chemistry journal article supplement (doi:10.1039/c2jm15007g), 2012-01-01
Supplement: c2jm15007g.pdf [file c2jm15007g.pdf]

## Supporting Information

# Effect of a Thermo-Responsive Polypeptide-Based Copolymer on Mineralization of Calcium Carbonate

Wenjie Zhu, Jiaping Lin\* and Chunhua Cai

*Shanghai Key Laboratory of Advanced Polymeric Materials, State Key Laboratory of Bioreactor Engineering, Key Laboratory for Ultrafine Materials of Ministry of Education, School of Materials Science and Engineering, East China University of Science and Technology, Shanghai 200237, China*

\* E-mail: [jlin@ecust.edu.cn](mailto:jlin@ecust.edu.cn) ; [jplinlab@online.sh.cn](mailto:jplinlab@online.sh.cn) (J. Lin)

## 1. $^1\text{H-NMR}$ analysis of the PNIPAM-*b*-PBLG and PNIPAM-*b*-PLGA

$^1\text{H}$  NMR spectra were recorded using Avance 550, Bruker. Figure S1 shows the  $^1\text{H}$  NMR spectra of PNIPAM-*b*-PBLG and PNIPAM-*b*-PLGA block copolymers in  $\text{CDCl}_3/\text{TFA}$  mixed solution. Since the degree of polymerization of the PNIPAM block is known, the molecular weight can be calculated by comparing the integral value of the characteristic peak of PNIPAM at  $\delta = 3.9$  ppm with that of PBLG at  $\delta = 5.1$  ppm (Figure S1a). The disappearance of the peak at 5.1 ppm indicates that the benzyl groups were completely removed after hydrolyzation (Figure S1b).<sup>1,2</sup>

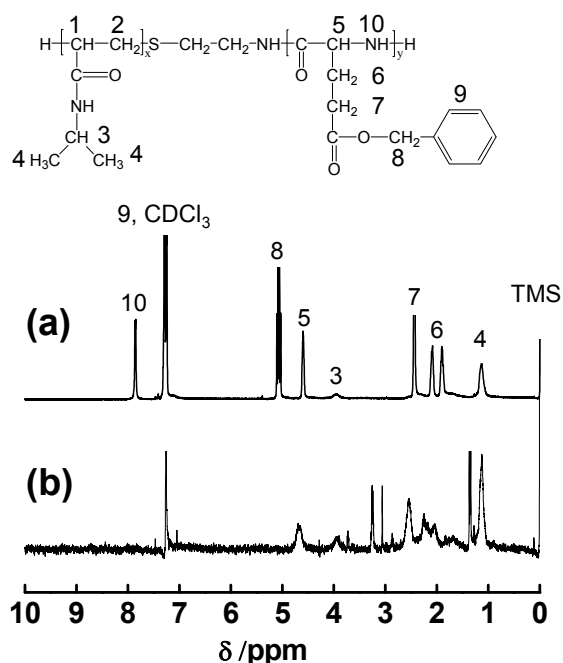

**Figure S1**  $^1\text{H}$  NMR spectra of PNIPAM<sub>45</sub>-*b*-PBLG<sub>192</sub> (a) and PNIPAM<sub>45</sub>-*b*-PLGA<sub>192</sub> (b) in  $\text{CDCl}_3$  and TFA mixed solvent (5/1, v/v).

## 2. The thermo-responsive behavior of NG192 studied by static light scattering (SLS)

SLS was employed to characterize the thermo-responsive behavior of NG192, since the copolymers aggregated and the solution turned cloudy when the temperature was raised from below the LCST to above the LCST. As shown in Figure S2, the scattered intensity is very weak at lower temperatures and dramatically increased above 33 °C. Above 50 °C, the scattered intensity basically remains constant.

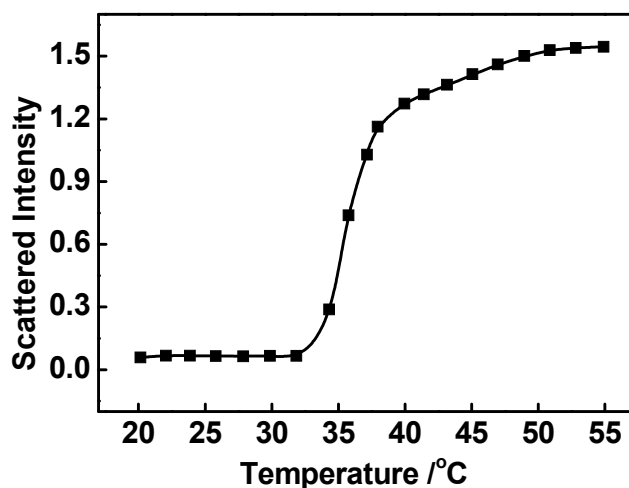

**Figure S2** Plot of scattered intensity as a function of temperature of the NG192 at the concentration of 2.0 g/L.

### 3. CaCO<sub>3</sub> crystallization controlled by PNIPAM and PLGA homopolymers

The influence of PNIPAM and PLGA homopolymers on CaCO<sub>3</sub> crystallization were studied as a control experiment. The degrees of polymerization of PNIPAM and PLGA homopolymers are 45 and 274 respectively. Rhombohedra crystals and rosette-like crystals were obtained in the presence of PNIPAM and PLGA respectively. The images indicate that the PNIPAM and PLGA homopolymers do not change their influences on CaCO<sub>3</sub> mineralization at different temperatures (Figure S3). The crystals are all calcite as indicated by the FT-IR measurement (Figure S4).<sup>3</sup>

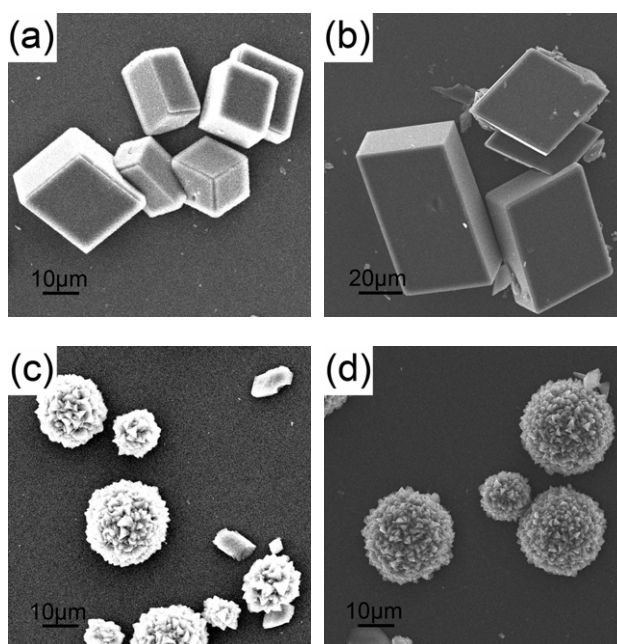

**Figure S3** SEM images of CaCO<sub>3</sub> crystals formed in the presence of PNIPAM and PLGA homopolymers at different temperatures. (a) PNIPAM, 25°C; (b) PNIPAM, 50°C; (c) PLGA, 25°C; (d) PLGA, 50°C. The polymer concentration is fixed at 1.0 g/L in each case.

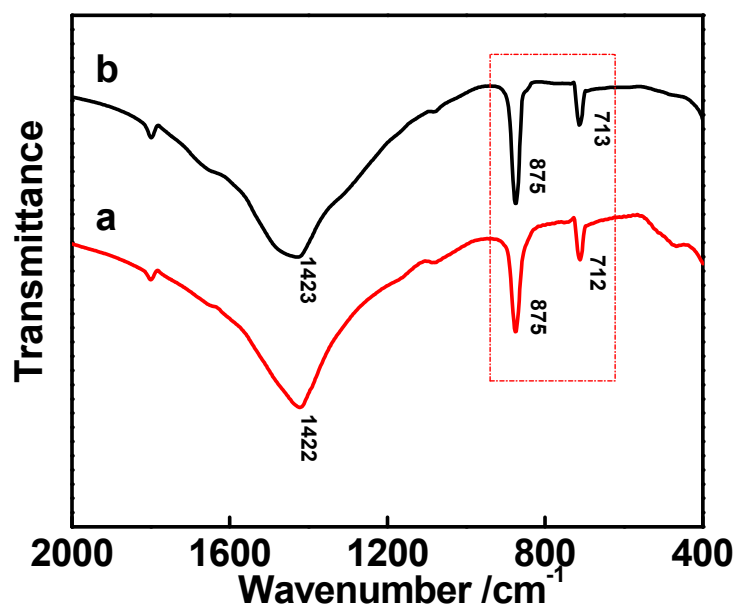

**Figure S4** FT-IR spectra of  $\text{CaCO}_3$  crystals formed in the presence of NG192 unimers with different copolymer concentrations at  $25^\circ\text{C}$ : (a) 1.0 g/L; (b) 0.1 g/L. The bands at 874 and  $712\text{ cm}^{-1}$  indicate the calcite formation.

#### 4. $\text{CaCO}_3$ crystallization in the micelle solution at $40^\circ\text{C}$

Figure S5 shows the SEM images of  $\text{CaCO}_3$  samples in the micelle solution at  $40^\circ\text{C}$ . The samples are mainly in the form of fibers, similar to the samples obtained at  $50^\circ\text{C}$ .

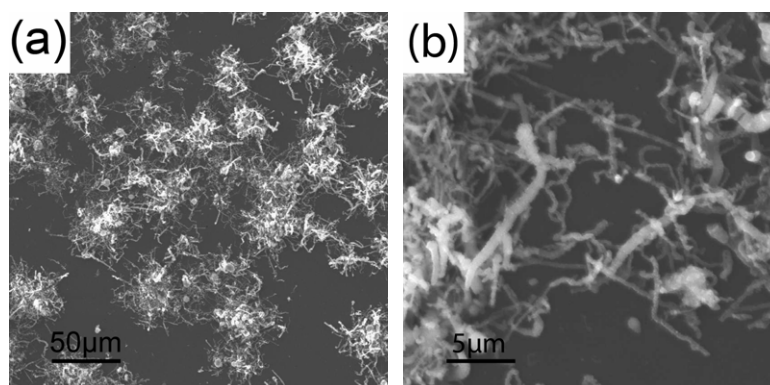

**Figure S5** SEM images of  $\text{CaCO}_3$  crystals in the presence of 2.0 g/L NG192 micelle solution at  $40^\circ\text{C}$  after 24 hour reaction.

Figure S6 shows FT-IR spectra of  $\text{CaCO}_3$  samples in the micelle solution at  $40^\circ\text{C}$ . In the FT-IR spectra, the absorption bands at 858,  $712\text{ cm}^{-1}$  are the characteristic bands of aragonite. The bands at 877 and  $745\text{ cm}^{-1}$  are assigned to the characteristic bands of vaterite. The result indicates that both aragonite and vaterite exist in the crystals.

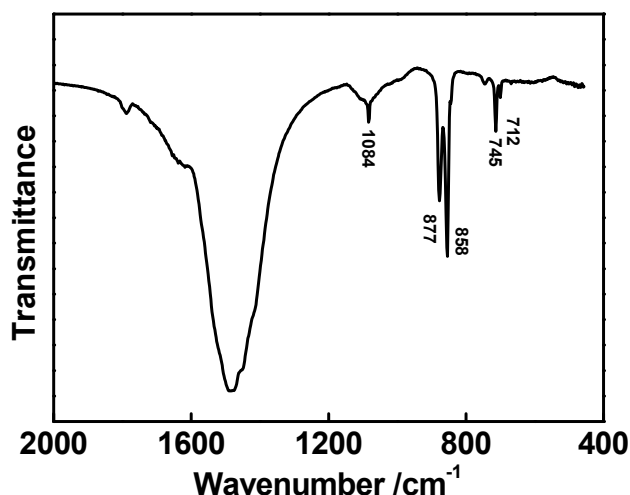

**Figure S6** FT-IR spectra of  $\text{CaCO}_3$  crystals formed in the presence of 2.0 g/L NG192 micelle solution at 40°C after 24 hour reaction.

### 5. FT-IR measurement of $\text{CaCO}_3$ crystals in the presence of NG12 and NG42 micelles

Figure S7 shows FT-IR spectra of  $\text{CaCO}_3$  crystals formed in the presence of NG12 and NG42 micelles. The absorption bands at 858, 712  $\text{cm}^{-1}$  are the characteristic bands of aragonite. And the bands at 877 and 745  $\text{cm}^{-1}$  are the characteristic bands of vaterite. In both cases, aragonite and vaterite exist in the samples.

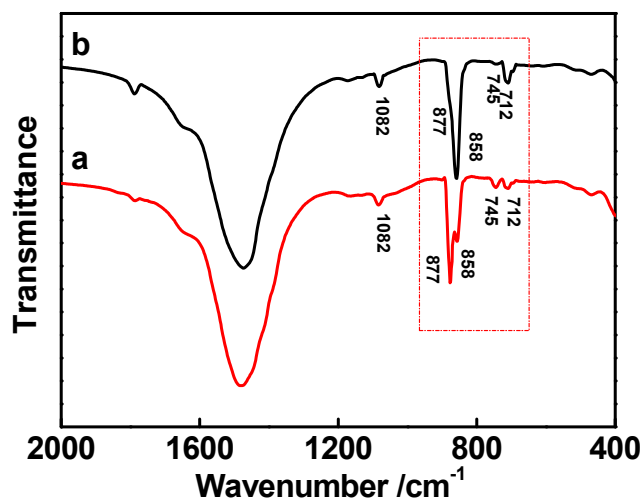

**Figure S7** FT-IR spectra of  $\text{CaCO}_3$  crystals formed in the presence of NG12 (a) and NG42 (b) micelles.

## References

- (S1) C. Cai, L. Zhang, J. Lin, L. Wang, *J. Phys. Chem. B.* 2008, **112**, 12666-12673.  
(S1) J. Rodríguez-Hernández, S. Lecommandoux, *J. Am. Chem. Soc.* 2005, **127**, 2026-2027.  
(S2) F. A. Andersen, L. Brecevic, *Acta Chim. Scand.* 1991, **45**, 1018.
